# Supplementary material for: An investigation on the key features of a D–π–A type novel chalcone derivative for opto-electronic applications
Source: Royal Society of Chemistry journal article supplement (doi:10.1039/c5ra13494c), 2015-01-01
Supplement: c5ra13494c1.pdf [file c5ra13494c1.pdf]

## Investigation on the key features of D- $\pi$ -A type novel chalcone derivative for opto-electronic applications

**Mohd. Shkir<sup>a,d\*</sup>, Shabbir Muhammad<sup>a,d\*</sup>, Salem AlFaify<sup>a,d</sup>, Ahmad Irfan<sup>c,d</sup>, Parutagouda Shankaragouda Patil<sup>b</sup>, Manju Arora<sup>e</sup>, Hamid Algarni<sup>a</sup>, Zhang Jingping<sup>f</sup>**

<sup>a</sup>Department of Physics, Faculty of Science, King Khalid University, P.O. Box. 9004 Abha 61413, Saudi Arabia

<sup>b</sup>Department of Physics, K. L. E. Institute of Technology, Opposite Airport, Gokul, Hubli 580 030, India

<sup>c</sup>Department of Chemistry, Faculty of Science, King Khalid University, Abha 61413, P.O. Box 9004, Saudi Arabia

<sup>d</sup>Research Center for Advanced Materials Science (RCAMS), King Khalid University, P.O. Box 9004, Abha 61413, Saudi Arabia.

<sup>e</sup>CSIR-National Physical Laboratory, Dr. K.S. Krishnan Road, New Delhi 110012, India

<sup>f</sup>Institute of Functional Material Chemistry, Faculty of Chemistry, Northeast Normal University, Renmin Road 5268, Changchun, Jilin 130024, P.R. China

**Table S1** Calculated bond lengths [Å] and bond angles [°] of 2,4,5-TMBC optimized molecule at DFT/B3LYP using 6-31G\* basis set.

| Bond lengths |       | Bond Angles |             |         | Dihedral angle |                 |          |          |
|--------------|-------|-------------|-------------|---------|----------------|-----------------|----------|----------|
|              | B3LYP | HF          | B3LYP       | HF      |                | B3LYP           | HF       |          |
| Br1-C10      | 1.911 | 1.897       | Br1-C10-C11 | 119.455 | 119.399        | O4-O3-O2-Br1    | -12.614  | -43.441  |
| C10-C11      | 1.395 | 1.385       | Br1-C10-C8  | 119.318 | 119.382        | O5-O4-O3-O2     | 2.151    | 3.956    |
| C11-H12      | 1.084 | 1.073       | C15-C16-O2  | 119.039 | 119.223        | C6-O2-Br1-O3    | 2.307    | -8.828   |
| C11-C13      | 1.391 | 1.381       | C17-C16-O2  | 121.984 | 122.077        | H7-C6-O2-Br1    | 175.406  | 173.632  |
| C13-H14      | 1.085 | 1.073       | C21-C22-O3  | 116.627 | 117.168        | C8-C6-O2-Br1    | 2.586    | 3.971    |
| C13-C15      | 1.404 | 1.392       | C23-C22-O3  | 122.753 | 122.514        | H9-C8-C6-O2     | 172.934  | 169.258  |
| C10-C8       | 1.393 | 1.381       | C23-C25-O4  | 124.550 | 124.232        | C10-C8-C6-O2    | -6.919   | -10.647  |
| C8-H9        | 1.085 | 1.073       | C26-C25-O4  | 115.566 | 115.862        | C11-C10-C8-C6   | 0.576    | 0.704    |
| C8-C6        | 1.395 | 1.386       | C27-C26-O5  | 125.679 | 125.504        | H12-C11-C10-C8  | 179.768  | 179.756  |
| C6-H7        | 1.085 | 1.074       | C25-C26-O5  | 115.472 | 115.844        | C13-C11-C10-C8  | -0.098   | -0.005   |
| C6-C15       | 1.403 | 1.389       | C22-O3-C29  | 119.334 | 120.875        | H14-C13-C11-C10 | 179.285  | 179.137  |
| C15-C16      | 1.507 | 1.505       | C25-O4-C33  | 118.553 | 120.222        | C15-C6-O2-Br1   | -14.927  | -21.183  |
| C16-O2       | 1.232 | 1.201       | C26-O5-C37  | 117.695 | 119.248        | C16-O2-Br1-C10  | -0.854   | -1.013   |
| C16-C17      | 1.475 | 1.481       | C15-C16-C17 | 118.972 | 118.693        | C17-C6-O2-Br1   | -179.012 | -178.927 |
| C17-H18      | 1.085 | 1.073       | C16-C17-C19 | 120.141 | 119.971        | H18-C17-C16-O2  | 174.213  | 169.465  |
| C17-C19      | 1.354 | 1.333       | C17-C19-C21 | 127.896 | 127.178        | C19-C17-C16-O2  | -4.447   | -10.184  |
| C19-H20      | 1.086 | 1.073       | C19-C21-C22 | 119.744 | 119.844        | H20-C19-C17-C16 | -0.991   | -2.189   |
| C19-C21      | 1.451 | 1.466       | C8-C6-C15   | 120.995 | 120.847        | C21-C19-C17-C16 | 178.995  | 178.348  |
| C21-C22      | 1.413 | 1.388       | C6-C15-C16  | 123.996 | 123.233        | C22-O3-O2-Br1   | -11.663  | -41.652  |
| C22-O3       | 1.363 | 1.348       | C6-C15-C13  | 118.506 | 118.837        | C23-C22-O3-O2   | -178.246 | -176.596 |
| O3-C29       | 1.418 | 1.400       | C15-C13-C11 | 121.225 | 120.928        | H24-C23-C22-O3  | 0.085    | 0.192    |
| C29-H30      | 1.091 | 1.079       | C13-C11-C10 | 118.953 | 119.065        | C25-O4-O3-O2    | 2.177    | 4.303    |
| C29-H31      | 1.098 | 1.085       | C11-C10-C8  | 121.227 | 121.219        | C26-O5-O4-O3    | 0.041    | 0.432    |
| C29-H32      | 1.098 | 1.085       | C21-C22-C23 | 120.620 | 120.315        | C27-C26-O5-O4   | -179.940 | -179.771 |
| C22-C23      | 1.403 | 1.397       | C22-C23-C25 | 120.530 | 120.633        | H28-C27-C26-O5  | 0.119    | 0.903    |
| C23-H24      | 1.081 | 1.069       | C23-C25-C26 | 119.884 | 119.905        | C29-O3-O2-Br1   | 171.915  | 148.958  |
| C23-C25      | 1.394 | 1.379       | C25-C26-C27 | 118.849 | 118.650        | H30-C29-O3-O2   | -3.638   | -10.083  |
| C25-O4       | 1.356 | 1.339       | C26-C27-C21 | 122.558 | 122.538        | H31-C29-O3-O2   | -122.283 | -128.636 |
|              |       |             |             |         |                | H32-C29-O3-O2   | 115.035  | 108.604  |

|         |       |       |             |         |         |               |          |          |
|---------|-------|-------|-------------|---------|---------|---------------|----------|----------|
| O4-C33  | 1.419 | 1.399 | C27-C21-C22 | 117.558 | 117.955 | C33-O4-O3-O2  | -177.803 | -175.299 |
| C33-H34 | 1.091 | 1.079 | C18-C17-C19 | 121.324 | 121.816 | H34-C33-O4-O3 | 179.986  | 179.955  |
| C33-H35 | 1.098 | 1.085 | C27-C21-C19 | 122.698 | 122.196 | H35-C33-O4-O3 | 61.244   | 61.253   |
| C33-H36 | 1.098 | 1.085 | C17-C19-H20 | 116.008 | 116.978 | H36-C33-O4-O3 | -61.275  | -61.354  |
| C25-C26 | 1.420 | 1.409 | C21-C19-H20 | 116.097 | 115.842 | C37-O5-O4-O3  | -174.407 | -171.055 |
| C26-O5  | 1.365 | 1.351 | C22-C21-C19 | 119.744 | 119.844 | H38-C37-O5-O4 | -5.603   | -8.680   |
| O5-C37  | 1.417 | 1.396 | C22-C23-H24 | 119.996 | 119.862 | H39-C37-O5-O4 | -124.400 | -127.417 |
| C37-H38 | 1.091 | 1.080 | C25-C23-H24 | 119.474 | 119.505 | H40-C37-O5-O4 | 113.216  | 110.107  |
| C37-H39 | 1.099 | 1.086 | C21-C27-H28 | 118.183 | 118.149 |               |          |          |
| C37-H40 | 1.099 | 1.086 | C15-C13-H14 | 118.039 | 118.841 |               |          |          |

**Table S2** B3LYP and HF calculated along with experimental IR and Raman frequencies with their appropriate assignments for 2,4,5-TMBC.

| Calculated (B3LYP)     | Calculated (HF)        | Exp.                   | Calculated (B3LYP)        | Calculated (HF)           | Exp.                      | Assignments                                                                     |
|------------------------|------------------------|------------------------|---------------------------|---------------------------|---------------------------|---------------------------------------------------------------------------------|
| IR (cm <sup>-1</sup> ) | IR (cm <sup>-1</sup> ) | IR (cm <sup>-1</sup> ) | Raman (cm <sup>-1</sup> ) | Raman (cm <sup>-1</sup> ) | Raman (cm <sup>-1</sup> ) |                                                                                 |
| ---                    | ---                    | ---                    | 3133                      | ---                       | 3133                      | $\nu_{\text{asy}}(\text{CH})$                                                   |
| 3070                   | 3075                   | 3081                   | 3103                      | 3075                      | 3083                      | $\nu_{\text{asy}}(\text{CH})$                                                   |
| 3018                   | 3046                   | ---                    | 3041                      | 3053                      | 3033,3021                 | $\nu_{\text{asy}}(\text{CH})$                                                   |
| 2988                   | 2975                   | 2998                   | ---                       | ---                       | 2998                      | $\nu_{\text{asy}}(\text{CH})$                                                   |
| ---                    | ---                    | 2952                   | 2965                      | ---                       | 2952                      | $\nu_{\text{asy}}(\text{CH})$                                                   |
| 2929                   | ---                    | 2927                   | 2910                      | 2925                      | 2933                      | $\nu_{\text{sym}}(\text{CH})$                                                   |
| 2855                   | 2867                   | 2852                   | ---                       | 2867                      | 2844                      | $\nu_{\text{sym}}(\text{CH})$                                                   |
| ---                    | 1739                   | 1735                   | ---                       | 1739                      | ---                       | $\nu(\text{CO})$                                                                |
| ---                    | ---                    | 1654                   | 1664                      | ---                       | 1652                      | $\nu(\text{CO})$                                                                |
| 1603                   | 1617                   | 1610                   | ---                       | 1617                      | 1610                      | $\nu_{\text{ring1}}(\text{C-C})$                                                |
| ---                    | 1585                   | 1587                   | 1572                      | 1582                      | 1575                      | $\nu_{\text{ring1+2}}(\text{C-H})$                                              |
| 1522                   | 1532                   | 1560                   | 1557                      | 1532                      | 1560                      | $\nu_{\text{ring2}}(\text{C-C})$                                                |
| 1499                   | 1485                   | 1511                   | ---                       | ---                       | ---                       | $\delta_{\text{in}}(\text{CCH}_{\text{ring1}}), \nu_{\text{ring1}}(\text{C-C})$ |
| 1455                   | 1558                   | 1470                   | 1472                      | 1475                      | 1482                      | $\delta_{\text{asym}}(\text{CH}_3)$                                             |
| 1418                   | 1403                   | 1442                   | 1395                      | 1403                      | 1455                      | $\nu_{\text{ring1}}(\text{C-C})$                                                |
| 1381                   | 1346                   | 1398                   | 1357                      | 1346                      | 1394                      | $\delta_{\text{sym}}(\text{CH}_3)$                                              |
| 1344                   | 1317                   | 1324                   | 1318                      | ---                       | 1358                      | $\delta_{\text{asym}}(\text{CH}_3)$                                             |
| 1306                   | 1303                   | 1295                   | 1295                      | 1303                      | 1290                      | $\nu_{\text{ring2}}(\text{C-C})$                                                |
| 1248                   | 1275                   | 1276                   | 1280                      | 1276                      | 1278                      | $\nu_{\text{ring2}}(\text{C-C})$                                                |
| ---                    | 1239,1203              | 1205                   | 1218                      | 1239,1206                 | 1204                      | $\delta_{\text{in}}(\text{CCH}_{\text{ring2}}), \nu_{\text{ring1}}(\text{C-C})$ |
| 1177                   | 1189                   | 1172                   | 1188                      | 1155                      | 1188                      | $\delta_{\text{in}}(\text{CCH}_{\text{ring1}}), \nu_{\text{ring1}}(\text{C-C})$ |
| 1144,1122              | 1125                   | 1128                   | 1126                      | 1125                      | 1128                      | $\delta_{\text{in}}(\text{CCH}_{\text{ring2}}), \nu_{\text{ring2}}(\text{C-C})$ |
| 1085                   | ---                    | 1070                   | 1090                      | 1067                      | 1070                      | $\nu_{\text{ring2}}(\text{C-C})$                                                |
| 1055                   | 1053                   | 1029                   | 1050                      | 1053                      | 1027                      | $\nu_{\text{ring1}}(\text{C-C})$                                                |
| 1010                   | 1011                   | 1006                   | 1021                      | 1012                      | 1004                      | $\delta_{\text{oop}}(\text{CH}_{\text{ring1}})$                                 |
| 980                    | 982                    | 990                    | 988                       | 996                       | 989                       | $\delta_{\text{oop}}(\text{CH}_{\text{ring1}})$                                 |
| 944                    | 889                    | 904                    | ---                       | 890                       | 908                       | $\delta_{\text{oop}}(\text{CH}_{\text{ring2}})$                                 |
| 862                    | 846                    | 856                    | 849                       | 846                       | 858                       | $\rho(\text{CH}_3), \delta_{\text{oop}}(\text{CH}_{\text{ring1,2}})$            |
| 796                    | 817,753                | 831                    | 826                       | 817                       | 830                       | $\delta_{\text{asym}}(\text{ring2}), \nu_{\text{ring2}}(\text{C-C})$            |
| ---                    | 732                    | 742                    | 734                       | 753,732                   | 746                       | $\delta_{\text{asym}}(\text{ring1})$                                            |
| 707                    | 667,646                | 647                    | 668                       | 689                       | 703                       | $\delta_{\text{puck}}(\text{ring1,2})$                                          |
| 603                    | 625                    | 626                    | 526                       | 617                       | 537                       | $\delta_{\text{asymdef}}(\text{ring1})$                                         |
| 506                    | 525                    | 538                    | 488                       | 525                       | 500                       | $\rho(\text{C-O}), \tau_{\text{asym}}(\text{ring2})$                            |
| 470                    | 465                    | 475                    | 456                       | 489                       | 456                       | $\tau_{\text{asym}}(\text{ring1})$                                              |
| 448                    | 417                    | 437                    | 445                       | 453                       | 437                       | $\tau_{\text{asym}}(\text{ring1}), \tau_{\text{asymdef}}(\text{ring1})$         |

Note: Types of vibration:  $\nu_{\text{sym}}, \nu_{\text{asym}}$ , symmetric and asymmetric stretching;  $\delta_{\text{sym}}, \delta_{\text{asym}}, \delta_{\text{asymdef}}$ , symmetric, asymmetric and asymmetric' deformation;  $\delta_{\text{in}}, \delta_{\text{oop}}$ , in plane and out of plane bending;  $\rho$ , rocking;  $\tau$ , torsion,  $\tau_{\text{asym}}, \tau_{\text{asymdef}}$ , asymmetric and asymmetric' deformation;  $\delta_{\text{puck}}$ , Puckring.

**Table S3** Absorption wavelength ( $\lambda_{ab}$ ), excitation energies E(eV), oscillator strengths ( $f_0$ ), and major contributions for transitions in 2,4,5-TMBC calculated at different levels of theory.

| Method           | $\lambda_{exc}$ | E(eV) | $f_0$  | Major contribution          |
|------------------|-----------------|-------|--------|-----------------------------|
| <i>B3LYP</i>     | 400.00          | 3.103 | 0.5196 | <i>H</i> → <i>L</i> (69.4%) |
| <i>HF</i>        | 270.00          | 4.596 | 0.0967 | <i>H</i> → <i>L</i> (57.3%) |
| <i>CAM-B3LYP</i> | 336.00          | 3.693 | 0.2560 | <i>H</i> → <i>L</i> (56%)   |
| <i>Wb97xd</i>    | 333.00          | 3.727 | 0.3128 | <i>H</i> → <i>L</i> (60%)   |
| <i>LC-BLYP</i>   | 298.17          | 4.158 | 0.8655 | <i>H</i> → <i>L</i> (61.4%) |

**Table S4**

(1) Calculated values of polarizability, hyperpolarizability and dipole moment along their individual tensor components of 2,4,5TMBC molecule at HF/6-31G\* level of theory.

| Polarizability and dipole moment |         |                           | Hyperpolarizability |           |                           |
|----------------------------------|---------|---------------------------|---------------------|-----------|---------------------------|
| Components                       | a. u.   | esu ( $\times 10^{-24}$ ) | Component           | a. u.     | esu ( $\times 10^{-30}$ ) |
| $\alpha_{xx}$                    | 353.725 | 52.41                     | $\beta_{xxx}$       | -1327.340 | -11.469                   |
| $\alpha_{xy}$                    | 7.925   | 1.174                     | $\beta_{xxy}$       | 864.122   | 7.466                     |
| $\alpha_{yy}$                    | 207.569 | 30.755                    | $\beta_{yyy}$       | -4.889    | -0.042                    |
| $\alpha_{xz}$                    | -13.308 | -1.972                    | $\beta_{yyy}$       | -32.415   | -0.28                     |
| $\alpha_{yz}$                    | 14.004  | 2.075                     | $\beta_{xxz}$       | 198.234   | 1.713                     |
| $\alpha_{zz}$                    | 110.977 | 16.443                    | $\beta_{xyz}$       | -47.106   | -0.407                    |
| $\alpha_{tot}$                   | 224.090 | 33.203                    | $\beta_{yyz}$       | 7.625     | 0.066                     |
| $\Delta\alpha$                   | 212.933 | 31.549                    | $\beta_{xzz}$       | 16.078    | 0.138                     |
| $\mu_x$                          | 2.017   | 5.127D                    | $\beta_{yzz}$       | 10.226    | 0.088                     |
| $\mu_y$                          | -0.454  | -1.153D                   | $\beta_{zzz}$       | -21.805   | -0.188                    |
| $\mu_z$                          | -0.339  | -0.861D                   | $\beta_0$           | 955.185   | 8.254                     |
| $\mu_{tot}$                      | 2.095   | 5.325D                    | $\beta_{tot}$       | 1591.976  | 13.756                    |

(2) Calculated values of polarizability, hyperpolarizability and dipole moment along their individual tensor components of 2,4,5TMBC molecule at CAM-B3LYP/6-31G\* level of theory.

| <i>Polarizability and dipole moment</i> |              |                                           | <i>Hyperpolarizability</i> |              |                                           |
|-----------------------------------------|--------------|-------------------------------------------|----------------------------|--------------|-------------------------------------------|
| <i>Components</i>                       | <i>a. u.</i> | <i>esu (<math>\times 10^{-24}</math>)</i> | <i>Component</i>           | <i>a. u.</i> | <i>esu (<math>\times 10^{-30}</math>)</i> |
| $\alpha_{xx}$                           | 409.436      | 29.34                                     | $\beta_{xxx}$              | -3222.768    | -38.565                                   |
| $\alpha_{xy}$                           | 3.213        | 4.30                                      | $\beta_{xxy}$              | 1571.185     | 19.132                                    |
| $\alpha_{yy}$                           | 229.257      | 36.75                                     | $\beta_{xyy}$              | -121.449     | -1.668                                    |
| $\alpha_{xz}$                           | -14.205      | 8.00                                      | $\beta_{yyy}$              | 22.265       | 0.311                                     |
| $\alpha_{yz}$                           | 12.659       | -4.74                                     | $\beta_{xxz}$              | 343.390      | 0.833                                     |
| $\alpha_{zz}$                           | 109.941      | 32.90                                     | $\beta_{xyz}$              | -59.111      | -0.176                                    |
| $\alpha_{tot}$                          | 315.177      | 46.699                                    | $\beta_{yyz}$              | 18.545       | 0.019                                     |
| $\Delta\alpha$                          | 267.443      | 39.626                                    | $\beta_{xzz}$              | 21.202       | 0.338                                     |
| $\mu_x$                                 | 2.038        | 5.181D                                    | $\beta_{yzz}$              | 10.940       | 0.072                                     |
| $\mu_y$                                 | -0.535       | -1.360D                                   | $\beta_{zzz}$              | -21.134      | -0.044                                    |
| $\mu_z$                                 | -0.307       | -0.780D                                   | $\beta_0$                  | 1467.657     | 12.682                                    |
| $\mu_{tot}$                             | 2.343        | 5.413D                                    | $\beta_{tot}$              | 2446.095     | 21.137                                    |

**(3)** Calculated values of polarizability, hyperpolarizability and dipole moment along their individual tensor components of 2,4,5TMBC molecule at wb97xd/6-31G\* level of theory.

| <i>Polarizability and dipole moment</i> |              |                                           | <i>Hyperpolarizability</i> |              |                                           |
|-----------------------------------------|--------------|-------------------------------------------|----------------------------|--------------|-------------------------------------------|
| <i>Components</i>                       | <i>a. u.</i> | <i>esu (<math>\times 10^{-24}</math>)</i> | <i>Component</i>           | <i>a. u.</i> | <i>esu (<math>\times 10^{-30}</math>)</i> |
| $\alpha_{xx}$                           | 409.567      | 29.34                                     | $\beta_{xxx}$              | -3087.331    | -26.677                                   |
| $\alpha_{xy}$                           | 3.507        | 4.30                                      | $\beta_{xxy}$              | 1508.303     | 13.033                                    |
| $\alpha_{yy}$                           | 230.091      | 36.75                                     | $\beta_{xyy}$              | -113.387     | -0.979                                    |
| $\alpha_{xz}$                           | -14.142      | 8.00                                      | $\beta_{yyy}$              | 19.599       | 0.169                                     |
| $\alpha_{yz}$                           | 12.731       | -4.74                                     | $\beta_{xxz}$              | 334.937      | 2.894                                     |
| $\alpha_{zz}$                           | 110.999      | 32.90                                     | $\beta_{xyz}$              | -59.535      | -0.514                                    |
| $\alpha_{tot}$                          | 250.219      | 37.074                                    | $\beta_{yyz}$              | 16.435       | 0.142                                     |
| $\Delta\alpha$                          | 261.474      | 38.572                                    | $\beta_{xzz}$              | 23.591       | 0.204                                     |
| $\mu_x$                                 | 2.058        | 5.231D                                    | $\beta_{yzz}$              | 13.436       | 0.116                                     |
| $\mu_y$                                 | -0.531       | -1.350D                                   | $\beta_{zzz}$              | -20.959      | -0.181                                    |
| $\mu_z$                                 | -0.307       | -0.781D                                   | $\beta_0$                  | 1504.749     | 13.046                                    |
| $\mu_{tot}$                             | 2.147        | 5.458D                                    | $\beta_{tot}$              | 2507.915     | 21.671                                    |

**(4)** Calculated values of polarizability, hyperpolarizability and dipole moment along their individual tensor components of 2,4,5TMBC molecule at LC-BLYP/6-31G\* level of theory.

| <i>Polarizability and dipole moment</i> |  |  | <i>Hyperpolarizability</i> |  |  |
|-----------------------------------------|--|--|----------------------------|--|--|
|-----------------------------------------|--|--|----------------------------|--|--|

| <i>Components</i> | <i>a. u.</i> | <i>esu (<math>\times 10^{-24}</math>)</i> | <i>Component</i> | <i>a. u.</i> | <i>esu (<math>\times 10^{-30}</math>)</i> |
|-------------------|--------------|-------------------------------------------|------------------|--------------|-------------------------------------------|
| $\alpha_{xx}$     | 375.555      | 55.645                                    | $\beta_{xxx}$    | -2410.545    | -20.829                                   |
| $\alpha_{xy}$     | 5.003        | 0.741                                     | $\beta_{xxy}$    | 1178.572     | 10.184                                    |
| $\alpha_{yy}$     | 223.814      | 33.162                                    | $\beta_{yyy}$    | -65.291      | -0.564                                    |
| $\alpha_{xz}$     | -7.517       | -1.114                                    | $\beta_{yyy}$    | -3.654       | -0.032                                    |
| $\alpha_{yz}$     | 8.556        | 1.267                                     | $\beta_{xxz}$    | 139.133      | 1.202                                     |
| $\alpha_{zz}$     | 98.464       | 14.589                                    | $\beta_{xyz}$    | -25.159      | -0.217                                    |
| $\alpha_{tot}$    | 232.611      | 34.465                                    | $\beta_{yyz}$    | 6.696        | 0.058                                     |
| $\Delta\alpha$    | 240.683      | 35.661                                    | $\beta_{xzz}$    | 19.828       | 0.171                                     |
| $\mu_x$           | 1.926        | 4.894D                                    | $\beta_{yzz}$    | 9.841        | 0.085                                     |
| $\mu_y$           | -0.474       | -1.204D                                   | $\beta_{zzz}$    | -10.256      | -0.088                                    |
| $\mu_z$           | -0.153       | -0.390D                                   | $\beta_0$        | 1158.324     | 10.009                                    |
| $\mu_{tot}$       | 1.989        | 5.055D                                    | $\beta_{tot}$    | 1930.539     | 16.682                                    |

**Table S5** Thermodynamic parameters of 2,4,5-TMBC molecule at 298K and 1PA

| Methods   | E (Thermal)<br>(KCal/Mol) | $C_v$<br>(Cal/Mol-Kelvin) | S<br>(Cal/Mol-Kelvin) |
|-----------|---------------------------|---------------------------|-----------------------|
| B3LYP     | 210.965                   | 82.303                    | 166.366               |
| HF        | 224.853                   | 77.052                    | 162.218               |
| CAM-B3LYP | 213.504                   | 81.120                    | 165.539               |
| Wb97xd    | 212.936                   | 81.114                    | 163.505               |
| LC-BLYP   | 216.803                   | 79.654                    | 163.643               |

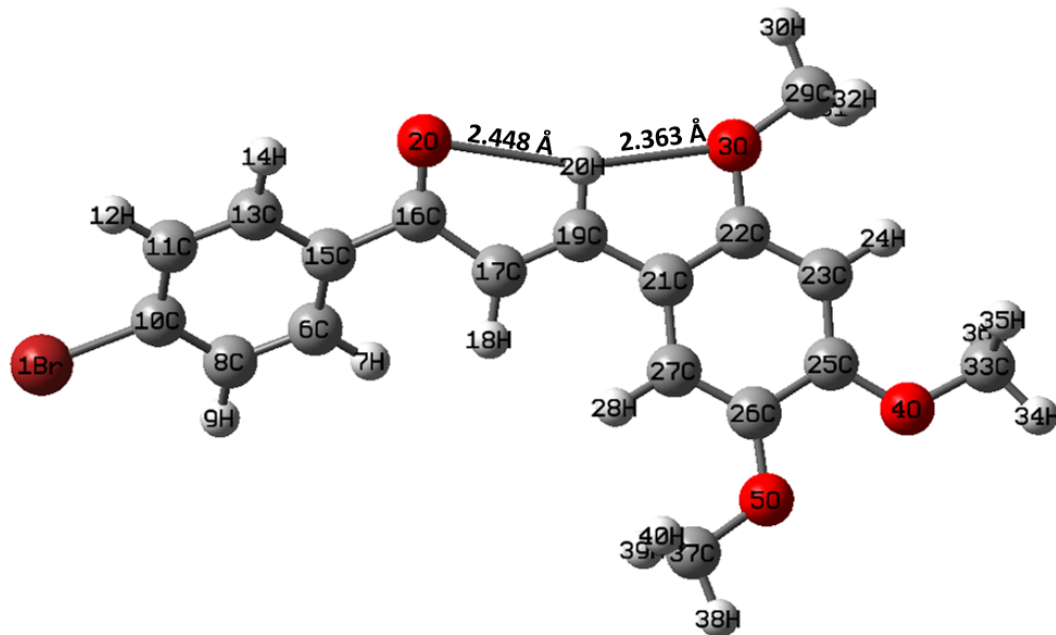

**Fig. S1 (b)** Optimized molecular geometry of 2,4,5TMBC molecule at HF using 6-31G\* basis set

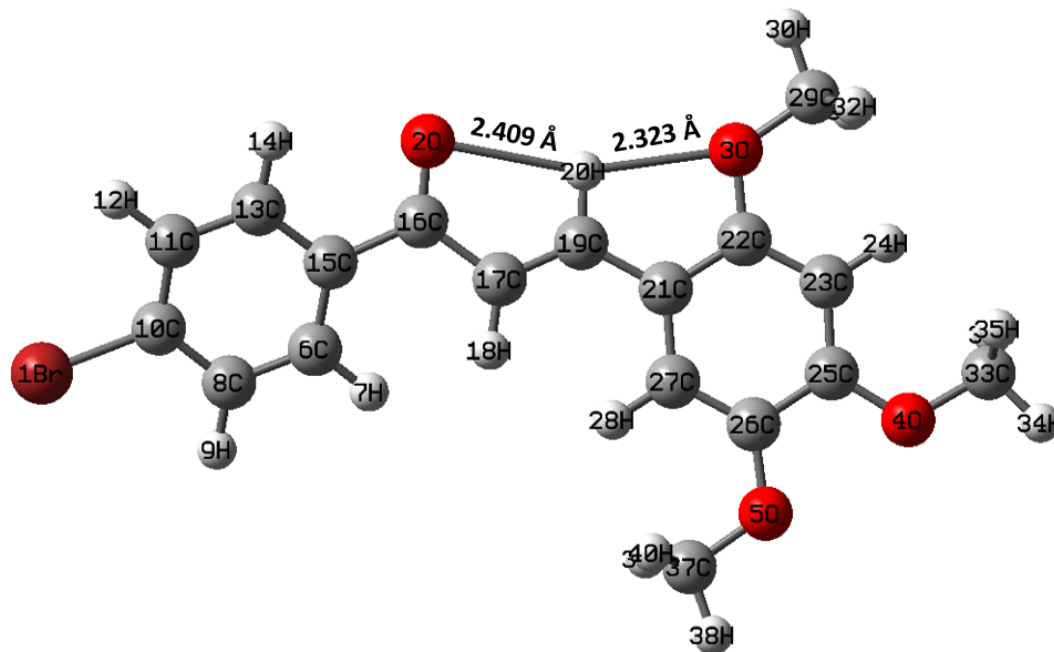

**Fig. S1 (c)** Optimized molecular geometry of 2,4,5TMBC molecule at CAM-B3LYP using 6-31G\* basis set

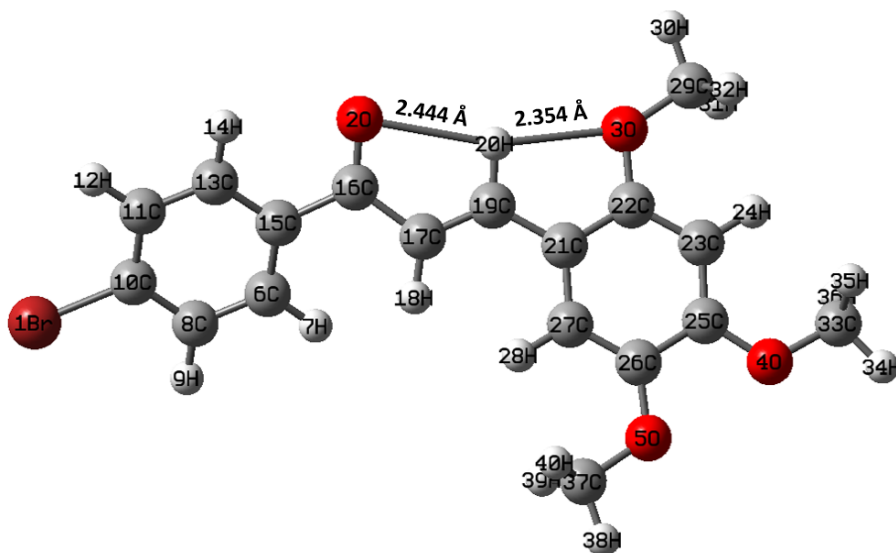

**Fig. S1 (d)** Optimized molecular geometry of 2,4,5TMBC molecule at wb97xd using 6-31G\* basis set

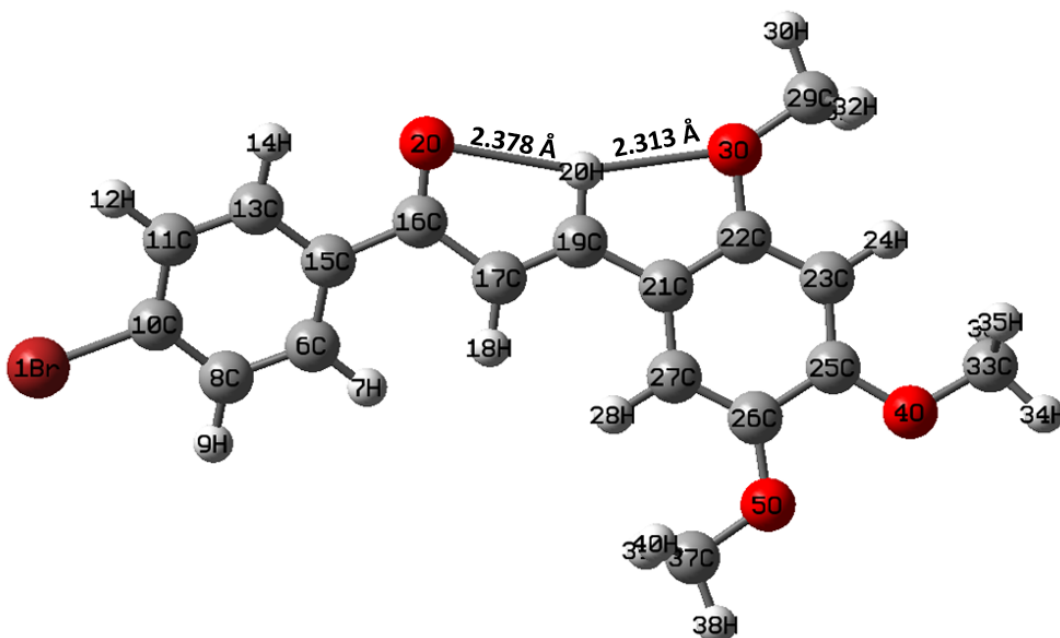

**Fig. S1 (e)** Optimized molecular geometry of 2,4,5TMBC molecule at LC-BLYP using 6-31G\* basis set

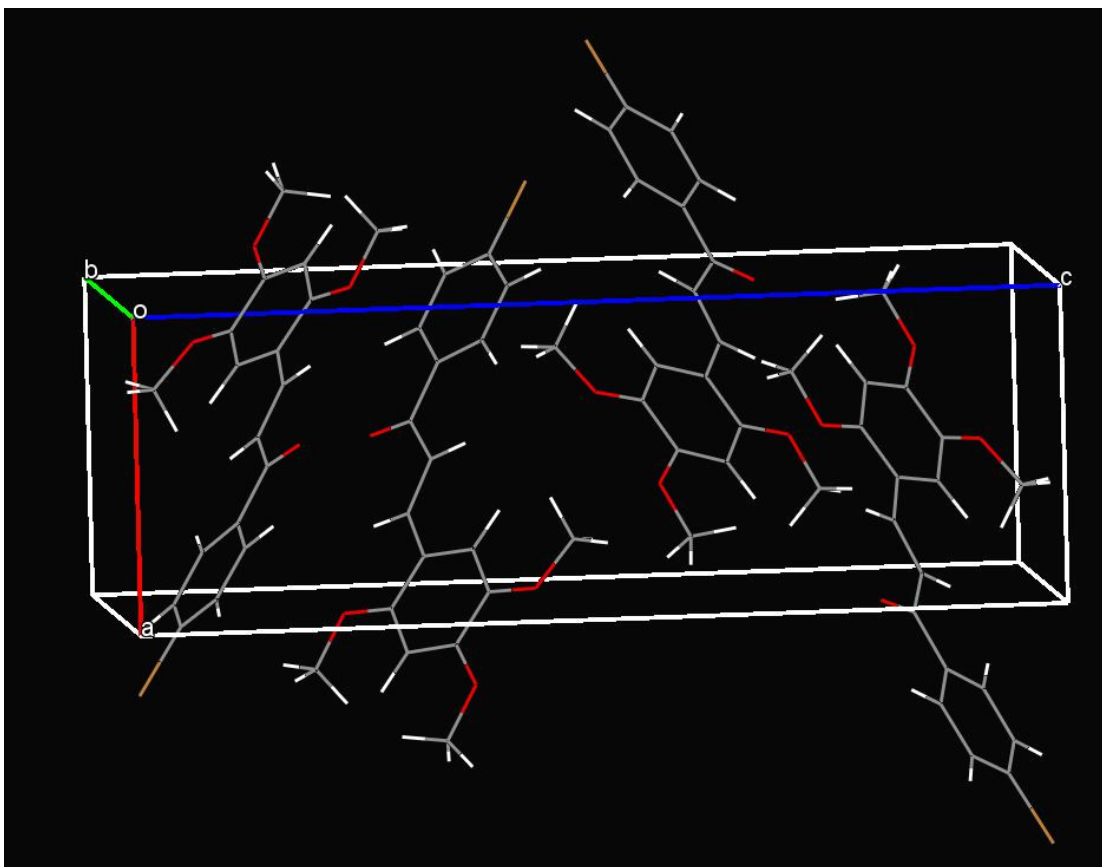

Fig. S2. Optimized geometry of 2,4,5-TMBC applying Periodic boundary conditions (PBC) at PBE/DNP level of theory.



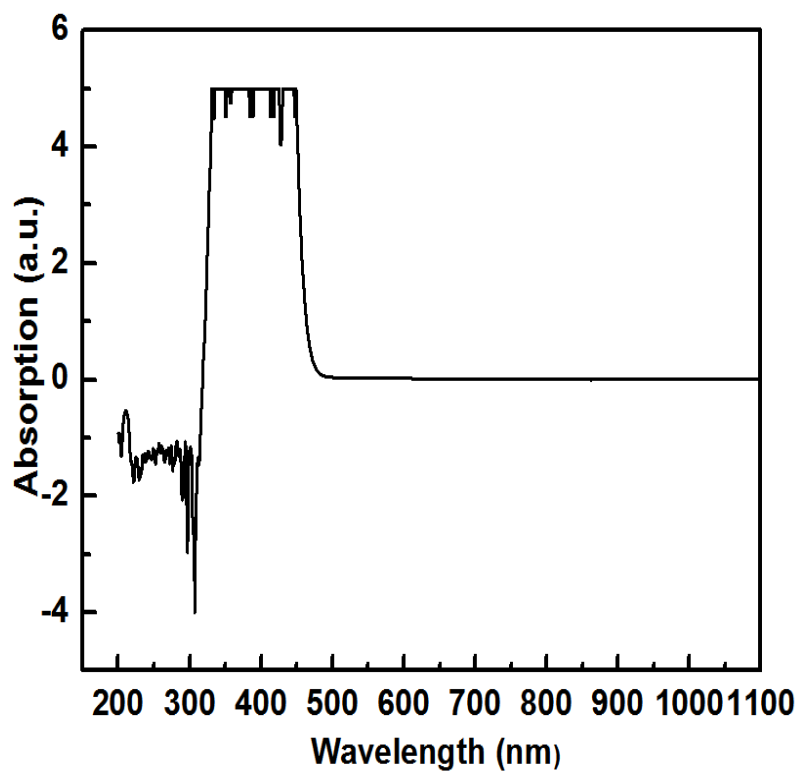

Fig. S3 Experimentally recorded UV-VIS-NIR spectra of 2,4,5-TMBC crystal molecule

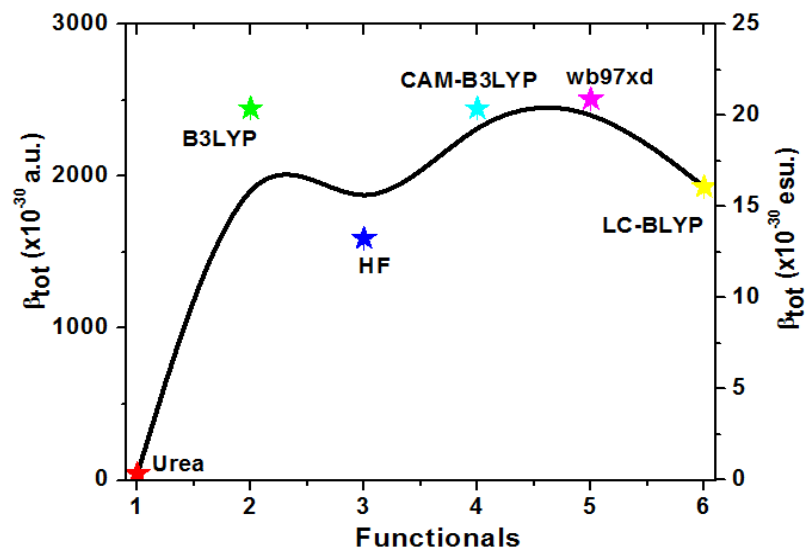

Fig. S4. Variation of hyperpolarizability values calculated at different levels of theory.

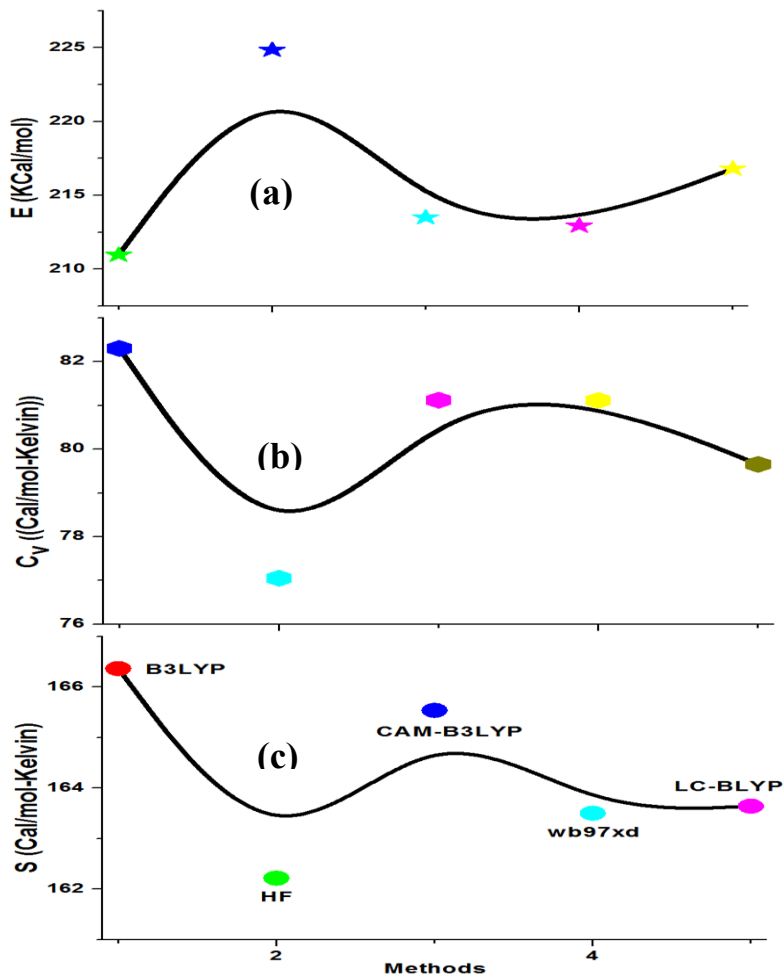

Fig. S5. Variation of thermodynamic parameters calculated at different levels of theory at 298K.

GCRD parameters of 2,4,5-TMBC molecule are computed as follows:

For absolute hardness ( $\eta$ ) an approximation was developed earlier [1-3] as given below:

$$\eta = \frac{I - A}{2}$$

where I is the vertical ionization energy and A is vertical electron affinity.

As per Koopman's theorem [4] connected within the framework of HF self-consistent field molecular orbital theory the ionization energy and electron affinity can be stated through HOMO and LUMO orbital energies:

$$I = E_{\text{HOMO}}$$

$$A = E_{\text{LUMO}}$$

Values of I and A of 2,4,5-TMBC are given in Table 2. As it is known that the higher HOMO energy relates to the more responsive molecule in the reactions with electrophiles, while lower LUMO energy is vital for molecular reactions with nucleophiles [5].

Hence, the hardness of any materials is communicates to the gap between the HOMO and LUMO orbitals. It evidently specifies that if the HOMO-LUMO energy gap is larger than molecule will be harder [3]. Therefore, the hardness ( $\eta$ ):

$$\eta = \frac{1}{2}(E_{\text{LUMO}} - E_{\text{HOMO}})$$

Chemical potential is calculated by:

$$\mu = -\left(\frac{I + A}{2}\right)$$

Softness is calculated by:

$$S = \frac{1}{2\eta}$$

Electronegativity is calculated by:

$$\chi = \left(\frac{I + A}{2}\right)$$

Electrophilic index is calculated by:

$$\omega = \frac{\mu^2}{2\eta}$$

where  $I [ E_{\text{HOMO}} = ( - 5.306)]$  is the ionization potential and  $A [ E_{\text{LUMO}} = ( 1.932)]$  is the electron affinity of the molecule.

- [1] R.G. Parr, P.K. Chattaraj, Journal of the American Chemical Society, 113 (1991) 1854-1855.
- [2] R.G. Pearson, Journal of the American Chemical Society, 107 (1985) 6801-6806.
- [3] R.G. Parr, R.G. Pearson, Journal of the American Chemical Society, 105 (1983) 7512-7516.
- [4] T. Koopmans, Physica, 1 (1933) 104-113.
- [5] A. Rauk, 2001, 34 (2001).
